# Supplementary material
Source: PubMed Central journal article supplement (PMC9169033)
Supplement: 41573_2022_477_MOESM1_ESM.pdf [file 41573_2022_477_MOESM1_ESM.pdf]

**Supplementary information**

---

**Thinking outside the box: non-canonical targets in multiple sclerosis**

---

In the format provided by the authors and unedited

Supplementary table | Overview of selected studies analysing metabolic profile in MS.

| Sample type | Sample size                           | Key Metabolite/pathways analyzed                                                 | Method/Technology       | Results/Changes in MS patients*                                                                                                                                                                    | Ref |
|-------------|---------------------------------------|----------------------------------------------------------------------------------|-------------------------|----------------------------------------------------------------------------------------------------------------------------------------------------------------------------------------------------|-----|
| Serum       | RRMS (209)<br>SPMS (136)<br>PPMS (51) | NAD <sup>+</sup> ; NADH                                                          | Thiazolyl blue assay    | ↓ in MS: NAD <sup>+</sup> , NAD <sup>+</sup> /NADH ratio                                                                                                                                           | 1   |
| Serum       | MS (23)                               | glucose, valine, selenium                                                        | <sup>1</sup> H-NMR      | ↑ in MS: glucose; ↓ in MS: valine, selenium                                                                                                                                                        | 2   |
| Serum       | RRMS (47)<br>NMO (44)                 | scyllo-inositol, glutamine, glutamate, acetate, lactate, lysine                  | <sup>1</sup> H-NMR      | ↑ in MS: scyllo-inositol, glutamine<br>↑ in NMO: acetate, glutamate, lactate, lysine                                                                                                               | 3   |
| Plasma      | RRMS (61)<br>PMS (12)                 | tryptophan metabolism, energy metabolism                                         | <sup>1</sup> H-NMR      | ↑ in MS: 3-hydroxybutyrate, acetoacetate, acetone, alanine, choline<br>↓ in MS: glucose, tryptophan, 5-hydroxytryptophan                                                                           | 4   |
| Serum       | RRMS (50)<br>SPMS (20)<br>PPMS (17)   | kynurenine pathway, tryptophan metabolism                                        | UHPLC<br>GC-MS          | ↑ in MS: kynurenine, K/T ratio, picolinic acid<br>↓ in MS: NAD <sup>+</sup> ; ↑ in RRMS: kynurenic acid<br>↑ in PPMS: quinolinic acid                                                              | 5   |
| Serum       | RRMS (360)<br>SPMS (132)<br>PPMS (26) | mitochondrial energy metabolism                                                  | HPLC                    | ↑ in MS: lactate, creatinine, uracil, β-pseudouridine, uridine, hypoxanthine, xanthine, inosine, uric acid, Σ oxypurines                                                                           | 6   |
| Plasma      | RRMS (22)                             | amino acids and acylcarnitines                                                   | LC-MS/MS                | ↑ in MS: glutamate; ↓ in MS: leucine, isoleucine, decenoylcarnitine                                                                                                                                | 7   |
| Serum       | RRMS (151)<br>PMS (100)               | ceramides                                                                        | HPLC-MS/MS              | ↑ in MS: Cer16:0; Cer22:1, Hex-Cer24:1, Lac-Cer24:1, Lac-Cer22:0, DH-Cer20:0, DH-Cer24:0; ↓ in MS: Hex-Cer16:1, Lac-Cer20:1, DH-HexCer26:0                                                         | 8   |
| Plasma      | RRMS (28)                             | plasma metabolome including amino acids                                          | NMR                     | ↓ in MS: arginine, citrate, isoleucine, serine, histidine, phenylalanine, methionine, asparagine, myo-inositol                                                                                     | 9   |
| Serum       | RRMS (24)                             | phosphatidylcholine phosphatidylethanolamine                                     | HILIC-MS                | phospholipids can differentiate between HC and MS especially: PC (34:3), PC (36:6), PE (40:10), PC (38:1)                                                                                          | 10  |
| Serum       | RRMS (56)<br>PMS (51)                 | bile acid metabolism                                                             | UPLC-MS/MS<br>LC-MS/MS  | ↓ in PMS: primary bile acid metabolites<br>↓ in RRMS and PMS: secondary bile acid metabolites                                                                                                      | 11  |
| Serum       | MS (514)                              | plasma metabolome including amino acids                                          | GC-MS<br>LC-MS/MS       | ↓ in MS with higher EDSS score: 3-(4-hydroxyphenyl) lactate (tyrosine metabolism)<br>↓ in MS: AAA metabolites (ILA, imidazole lactate, PLA, kynurenine, kynurenate, tryptophan, and phenylalanine) | 12  |
| Plasma, CSF | MS (32)                               | tryptophan, amino acids                                                          | IEC                     | ↓ in MS: tryptophan, leucine, isoleucine, valine, tyrosine, phenylalanine                                                                                                                          | 13  |
| Serum, CSF  | RRMS (5)<br>SPMS (9)<br>NMO (9)       | nitric oxide, nitrate, nitrite, l-arginine, asymmetric dimethylarginine          | GC-MS/MS                | ↑ in MS/NMO: asymmetric dimethylarginine;<br>↑ in NMO: nitrate, nitrite<br>↓ in NMO: l-arginine                                                                                                    | 14  |
| Serum, CSF  | RRMS (22)<br>PPMS (12)                | lipids, biogenic amines, amino acids                                             | NMR<br>GC-MS/<br>LC-MS  | differentiate RRMS vs PPMS; <u>CSF</u> : nitrogen, arginine and ornithine metabolism, branched chain amino acid biosynthesis; <u>Serum</u> : glutathione, nitrogen, arginine and proline met.      | 15  |
| CSF         | MS (19)                               | lactate, fructose, creatinine, phenylalanine                                     | MRS                     | ↑ in MS: lactate, fructose; ↓ in MS: creatinine, phenylalanine                                                                                                                                     | 16  |
| CSF         | RRMS (26)<br>SPMS (6)                 | kynurenic acid                                                                   | HPLC                    | ↓ in MS: kynurenic acid                                                                                                                                                                            | 17  |
| CSF         | RRMS (15)                             | NO metabolites, glutathione                                                      | WB, CLIA                | ↑ in MS: nitrotyrosine, nitrate, oxidized glutathione and S-nitrosothiols                                                                                                                          | 18  |
| CSF         | CIS (33)                              | glutamine, b-hydroxyisobutyrate (BHIB), fructose, acetate, creatinine, β-glucose | <sup>1</sup> H-NMR      | ↑ in CIS: BHIB, glutamine; fructose; creatinine, β-glucose;<br>↓ in CIS: acetate                                                                                                                   | 19  |
| CSF         | RRMS (85);<br>SPMS (54)               | sorbitol, fructose, lactate, glucose metabolism                                  | GC-MS                   | ↑ in MS: sorbitol, fructose, lactate                                                                                                                                                               | 20  |
| CSF         | RRMS (11);<br>SPMS (3)<br>CIS (1)     | energy, biogenic amine, phospholipid metabolism                                  | <sup>1</sup> H-NMR      | ↑ in MS: citrate, mannose, 3-hydroxybutyrate, phenylalanine, 2-hydroxyisovalerate;<br>↓ in MS: choline, myo-inositol, threonate                                                                    | 21  |
| CSF         | RRMS (13)                             | Lipidomics, acylcarnitines, aminoacids                                           | MALDI-TOF-MS<br>LCMS/MS | ↑ in MS: glutamate, lysophosphatidylcholine (18:1; 18:0), lysophosphatidylinositol 16:0, phosphatidylcholine, phosphatidylinositol<br>↓ in MS: phosphatidic acid                                   | 22  |

|                      |                                               |                                                                                                                             |                      |                                                                                                                                                                             |    |
|----------------------|-----------------------------------------------|-----------------------------------------------------------------------------------------------------------------------------|----------------------|-----------------------------------------------------------------------------------------------------------------------------------------------------------------------------|----|
| CSF                  | MS (50)<br>NMO (57)                           | 2-hydroxybutyrate, acetone, formate, citrate, lactate, pyroglutamate, acetate, glucose                                      | <sup>1</sup> H-NMR   | ↑ in MS/NMO: 2-hydroxybutyrate, acetone, formate, pyroglutamate; ↓ in MS/NMO: acetate, glucose; ↑ in MS: citrate; ↑ in NMO: lactate                                         | 23 |
| CSF                  | SPMS (12)                                     | glycerophospholipids, glycerides, acylcarnitines, sphingolipids, amino acids, biogenic amines, cholesteryl- esters, hexoses | LC-HRMS/<br>FIA-HRMS | ↑ in SPMS: glycine, asymmetric dimethylarginine, glycerophospholipid PC-O (34:0), hexoses                                                                                   | 24 |
| Urin                 | RRMS (8),<br>NMO (9)                          | ketone bodies, amino acids, propionate, pyruvate, tricarboxylic acid cycle, glycolysis                                      | NMR                  | ↑ in MS: 3-hydroxyisovalerate, oxaloacetate; ↓ in MS: creatinine; ↑ in NMO: oxaloacetate; ↓ in NMO: creatinine, 3-hydroxybutyrate, methylmalonate                           | 25 |
| Urin                 | RRMS (47)                                     | tryptophan metabolism, kynurenine pathway                                                                                   | HPLCMS/MS            | ↓ in MS: kynurenine, K/T ratio; ↓ in K/A ratio with recent relapse                                                                                                          | 26 |
| Retina               | RRMS (124)<br>CIS (7)<br>PPMS (9)<br>SPMS (3) | NADH, N-acetyl-aspartate, amyloid-beta                                                                                      | Raman spectroscopy   | ↑ in MS: amyloid-beta; ↓ in MS: NADH, NAA                                                                                                                                   | 27 |
| MRI                  | non-lesional MS (15)<br>lesional MS (20)      | Glutamate, Glutamine, N-acetylaspartate, creatine, myo-Inositol, choline                                                    | qMRI                 | ↑ in MS: glutamate, glutamine; ↓ in lesional MS: N-acetylaspartate, N-acetylaspartate-glutamate                                                                             | 28 |
| Microbiome/<br>Serum | MS (129/90)                                   | Gut microbiome, plasma metabolome including lipids and amino acids                                                          | LC/MS                | ↓ in MS: indolepropionate, indolelactate, sphingosine 1-phosphate, β-hydroxyasparagine, carnitine<br>↓ in MS: levels of microboitic species involved in butyrate production | 29 |

\* Limited to the most relevant findings of the publication

Abbreviations: CLIA chemiluminescence assay; FIA-HRMS flow-injection analysis-HRMS; GC-MS gas chromatography-mass spectrometry; HILIC-MS hydrophilic interaction chromatography-mass spectrometry; <sup>1</sup>H-NMR – <sup>1</sup>H nuclear magnetic resonance; HPLC high-performance liquid chromatography; HRMS high-resolution mass spectrometry; IEC ion-exchange chromatography; LC-MS liquid chromatography-mass spectrometry; MALDI-TOF-MS matrix-assisted laser desorption ionization-time of flight - mass spectrometry; MS multiple sclerosis; NAD nicotinamide adenine dinucleotide; NMO neuromyelitis optica; PMS progressive multiple sclerosis; PPMS primary progressive multiple sclerosis; RRMS relapsing remitting multiple sclerosis; SPMS secondary progressive multiple sclerosis; UHPLC ultra-high-pressure liquid chromatography; WB western blot; qMRI quantitative magnetic resonance imaging.

## References

1. Brady, N., Lim, C. K., Grant, R., Brew, B. J. & Guillemin, G. J. Serum nicotinamide adenine dinucleotide levels through disease course in multiple sclerosis. *Brain Res.* **1537**, 267–272 (2013).
2. Mehrpour, M., Kyani, A., Tafazzoli, M., Fathi, F. & Joghataie, M.-T. A metabolomics investigation of multiple sclerosis by nuclear magnetic resonance. *Magn. Reson. Chem.* **51**, 102–109 (2013).
3. Moussallieh, F.-M. *et al.* Serum analysis by <sup>1</sup>H Nuclear Magnetic Resonance spectroscopy: a new tool for distinguishing neuromyelitis optica from multiple sclerosis. *Mult. Scler. J.* **20**, 558–565 (2014).
4. Cocco, E. *et al.* <sup>1</sup>H-NMR analysis provides a metabolomic profile of patients with multiple sclerosis. *Neurol. Neuroimmunol. Neuroinflammation* **3**, (2015).
5. Lim, C. K. *et al.* Kynurenine pathway metabolomics predicts and provides mechanistic insight into multiple sclerosis progression. *Sci. Rep.* **7**, 1–9 (2017).

6. Lazzarino, G. *et al.* Serum Compounds of Energy Metabolism Impairment Are Related to Disability, Disease Course and Neuroimaging in Multiple Sclerosis. *Mol. Neurobiol.* **54**, 7520–7533 (2017).
7. Kasakin, M. F. *et al.* Targeted metabolomics approach for identification of relapsing–remitting multiple sclerosis markers and evaluation of diagnostic models. *MedChemComm* **10**, 1803–1809 (2019).
8. Filippatou, A. G. *et al.* Serum ceramide levels are altered in multiple sclerosis. *Mult. Scler. J.* 1–14 (2020).
9. Sylvestre, D. A., Slupsky, C. M., Aviv, R. I., Swardfager, W. & Taha, A. Y. Untargeted metabolomic analysis of plasma from relapsing-remitting multiple sclerosis patients reveals changes in metabolites associated with structural changes in brain. *Brain Res.* **1732**, 146589 (2020).
10. Ferreira, H. B. *et al.* Serum phospholipidomics reveals altered lipid profile and promising biomarkers in multiple sclerosis. *Arch. Biochem. Biophys.* **697**, 108672 (2021).
11. Bhargava, P. *et al.* Bile acid metabolism is altered in multiple sclerosis and supplementation ameliorates neuroinflammation. *J. Clin. Invest.* (2020).
12. Fitzgerald, K. C. *et al.* Multi-omic evaluation of metabolic alterations in multiple sclerosis identifies shifts in aromatic amino acid metabolism. *Cell Rep. Med.* **2**, 100424 (2021).
13. Monaco, F., Fumero, S., Mondino, A. & Mutani, R. Plasma and cerebrospinal fluid tryptophan in multiple sclerosis and degenerative diseases. *J. Neurol. Neurosurg. Psychiatry* **42**, 640–641 (1979).
14. Haghikia, A. *et al.* Serum and cerebrospinal fluid concentrations of homoarginine, arginine, asymmetric and symmetric dimethylarginine, nitrite and nitrate in patients with multiple sclerosis and neuromyelitis optica. *Amino Acids* **47**, 1837–1845 (2015).
15. Murgia, F. *et al.* Multi-Platform Characterization of Cerebrospinal Fluid and Serum Metabolome of Patients Affected by Relapsing–Remitting and Primary Progressive Multiple Sclerosis. *J. Clin. Med.* **9**, 863 (2020).
16. Nicoli, F. *et al.* Cerebrospinal fluid metabolic profiles in multiple sclerosis and degenerative dementias obtained by high resolution proton magnetic resonance spectroscopy. *C. R. Acad. Sci. III* **319**, 623–631 (1996).
17. Rejdak, K. *et al.* Decreased level of kynurenic acid in cerebrospinal fluid of relapsing-onset multiple sclerosis patients. *Neurosci. Lett.* **331**, 63–65 (2002).
18. Calabrese, V. *et al.* Nitric oxide synthase is present in the cerebrospinal fluid of patients with active multiple sclerosis and is associated with increases in cerebrospinal fluid protein nitrotyrosine and S-nitrosothiols and with changes in glutathione levels. *J. Neurosci. Res.* **70**, 580–587 (2002).

19. Lutz, N. W. *et al.* Inflammatory Multiple-Sclerosis Plaques Generate Characteristic Metabolic Profiles in Cerebrospinal Fluid. *PLoS ONE* **2**, (2007).
20. Regenold, W. T., Phatak, P., Makley, M. J., Stone, R. D. & Kling, M. A. Cerebrospinal fluid evidence of increased extra-mitochondrial glucose metabolism implicates mitochondrial dysfunction in multiple sclerosis disease progression. *J. Neurol. Sci.* **275**, 106–112 (2008).
21. Reinke, S. *et al.* Metabolomic profiling in multiple sclerosis: insights into biomarkers and pathogenesis. *Mult. Scler. J.* **20**, 1396–1400 (2014).
22. Pieragostino, D. *et al.* An integrated metabolomics approach for the research of new cerebrospinal fluid biomarkers of multiple sclerosis. *Mol. Biosyst.* **11**, 1563–1572 (2015).
23. Kim, H.-H. *et al.* Metabolomic profiling of CSF in multiple sclerosis and neuromyelitis optica spectrum disorder by nuclear magnetic resonance. *PLOS ONE* **12**, e0181758 (2017).
24. Carlsson, H. *et al.* Targeted metabolomics of CSF in healthy individuals and patients with secondary progressive multiple sclerosis using high-resolution mass spectrometry. *Metabolomics* **16**, (2020).
25. Gebregiworgis, T. *et al.* A Urinary Metabolic Signature for Multiple Sclerosis and Neuromyelitis Optica. *J. Proteome Res.* **15**, 659–666 (2016).
26. Gaetani, L. *et al.* Host and Microbial Tryptophan Metabolic Profiling in Multiple Sclerosis. *Front. Immunol.* **11**, (2020).
27. Alba-Arbalat, S. *et al.* In Vivo Molecular Changes in the Retina of Patients With Multiple Sclerosis. *Invest. Ophthalmol. Vis. Sci.* **62**, 11–11 (2021).
28. Tisell, A. *et al.* Increased Concentrations of Glutamate and Glutamine in Normal-Appearing White Matter of Patients with Multiple Sclerosis and Normal MR Imaging Brain Scans. *PLOS ONE* **8**, e61817 (2013).
29. Levi, I. *et al.* Potential role of indolelactate and butyrate in multiple sclerosis revealed by integrated microbiome-metabolome analysis. *Cell Rep. Med.* **2**, 100246 (2021).
